# Supplementary material for: Exo-π-bonding to an ortho-carborane hypercarbon atom: systematic icosahedral cage distortions reflected in the structures of the fluoro-, hydroxy- and amino-carboranes, 1-X-2-Ph-1,2-C2B10H10 (X = F, OH or NH2) and related anions
Source: Royal Society of Chemistry journal article supplement (doi:10.1039/b406422d), 2004-01-01
Supplement: b406422d.doc [file b406422d.doc]

Structural data for (HCbo)2 and related derivatives

| Ref | This work[[1]](#footnote-2) | FASQAR[[2]](#footnote-3) | KOWJOV[[3]](#footnote-4) | KEVXEO[[4]](#footnote-5) | GULQOT[[5]](#footnote-6) | GULQUZError: Reference source not found | KOWJUBError: Reference source not found |
| --- | --- | --- | --- | --- | --- | --- | --- |
|  | HCboCboH | HCb*Cb*H | HCboCboH2- | HCboCboH2- | HCboHCboH- | HCboHCboH- | HCboHHCboH2- |
| **C1-C2** | ***1.625*** | **1.638** | **2.409** | **2.414** | ***2.551*** | ***2.457*** | **2.792** |
| C1-C1’ | *1.543* | 1.529 | 1.370 | 1.377 | *1.628* | *1.657* | 1.514 |
| C1-B3/6 | *1.744* | 1.738 | 1.887 | 1.882 | Very poor | Very poor | 2.347 |
| C1-B4/5 | *1.726* | 1.712 | 1.632 | 1.630 |  |  | 1.657 |
| C2-B3/6 | *1.715* | 1.717 | 1.661 | 1.662 |  |  | 1.628 |
| B3/6-B4/5 | *1.783* | 1.773 | 1.847 | 1.840 |  |  | 1.867 |
| B4-B5 | *1.786* | 1.775 | 1.830 | 1.823 |  |  | 1.848 |
| Tors1 | *180* | 180 | 171.9 | 180 |  |  | 180 |
| δ1 | *0.032* | 0.035 | 0.507 | 0.499 |  |  | 0.728 |
| δ2 | *0.044* | 0.042 | 0.354 | 0.361 |  |  | 0.180 |

Selected X-ray data for PhCboNH2. 4 unique molecules, A to D. Distances in Å and angles in degrees.

|  | A | B | C | D |
| --- | --- | --- | --- | --- |
| C1-C2 | 1.786 | 1.765 | 1.745 | 1.774 |
| C1-N | 1.392 | 1.403 | 1.391 | 1.404 |
|  |  |  |  |  |
| Tors1 | 78.1 |  | 51.5 | 59.8 |
|  | 88.9 |  | 64.2 | 80.0 |
| Tors2 | 105.0 | 91.3 | 109.0 | 114.4 |
|  | 76.7 | 91.0 | 69.9 | 64.1 |

Tors1 C2-C1-N-H, Tors2 C1-C2-C-C.

Total Energies for fully optimized geometries (MP2/6-31G*)

PhCboH -561.13989

PhCboH(90) -561.13957

PhCboF -660.14170

PhCboOH -636.16380

PhCboSH -958.76875

PhCboNH2(away) -616.33040

PhCboNH2(near) -616.32948

PhCboOLi -643.12288

PhCboONa -797.50838

PhCboS- -958.25492

PhCboO- -635.65538

PhCboNH- -615.78439

PhCboNH-(90) -615.78072

PhCboCH2- -599.73727

PhCboHH- -561.74816

HCboO- -405.34350

HCboOH -405.85424

HCbmOH -405.87547

HCbpOH -405.88115

(HCbo)2 -660.50419

PhCboPh2- -791.39291

Total Energies in au for model compounds HCboX

| X | Energy (0) | Energy (90) | Energy (180) |
| --- | --- | --- | --- |
| CH2- | -369.37390 | -369.42199 |  |
| NH- | -385.43955 | -385.46733 | -385.44243 |
| NH2 | -386.00656 | -386.01552 |  |
| OH | -405.84664 | -405.85366 | -405.85306 |
| SH | -728.45239 | -728.45862 | -728.45509 |
| HH- | -331.43669 | -331.31886 |  |

1. The bis(carborane) was calculated at MP2/6-31G* as the cages are reported to be disordered in the crystal. Observed C1-C1’ 1.602/1.522 (DOCBOR02/DOCBOR). X. Yang, W. Jiang, C.B. Knobler, M.D. Mortimer and M.F. Hawthorne, *Inorg. Chim. Acta*, 1995, **240**, 371. L.H. Hall, A. Perloff, F.A. Maver and S. Block, *J. Chem. Phys*., 1965, **43**, 3911. [↑](#footnote-ref-2)
2. Cb* = 8,9,10,12-Me4-1,2-C2B10H6 FASQAR A. Herzog, A. Maderna, G.N. Harakas, C.B. Knobler and M.F. Hawthorne, *Chem. Eur. J*., 1999, **5**, 1212. [↑](#footnote-ref-3)
3. KOWJOV/KOWJUB T.D. Getman, C.B. Knobler and M.F. Hawthorne, *Inorg. Chem*., 1992, **31**, 101. [↑](#footnote-ref-4)
4. KEVXEO T.D. Getman, C.B. Knobler and M.F. Hawthorne, *J. Am. Chem. Soc*., 1990, **112**, 4593 [↑](#footnote-ref-5)
5. GULQOT/GULQUZ S. Wang, Q. Yang, T.C.W. Mak and Z. Xie*, Organometallics*, 1999, **18**, 4478. Poor quality structural data. [↑](#footnote-ref-6)
